# Supplementary material
Source: Springer Nature journal article supplement (https://www.springermedizin.de/resource/supplementary/12885_2007_819_MOESM4_ESM.pdf/9470408)

Figure 4a

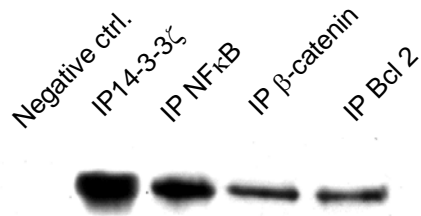

Figure 4b

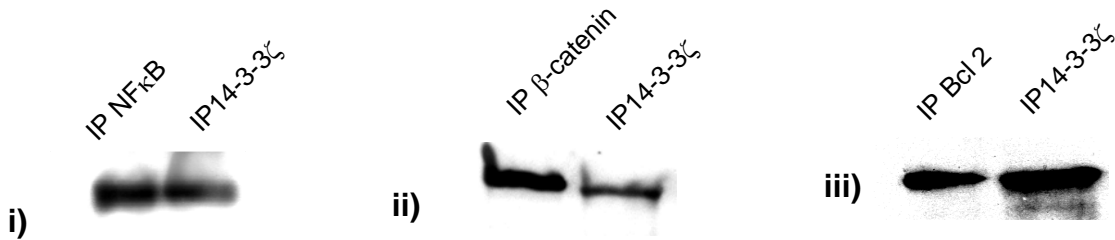

Supplement: MOESM4 [file 9470408]
